# Supplementary material
Source: PubMed Central journal article supplement (PMC7220622)
Supplement: 11224_2020_1537_MOESM1_ESM.pdf [file 11224_2020_1537_MOESM1_ESM.pdf]

# **In Silico Fight Against Novel Coronavirus by Finding Chromone Derivatives as Inhibitor of Coronavirus Main Proteases Enzyme**

Nayim Sepay<sup>a\*</sup>, Nadir Sepay<sup>b</sup>, Ashique Al Hoque<sup>c</sup>, Rina Mondal<sup>d</sup>, Umesh Chandra Halder<sup>a\*</sup> and Mohd. Muddassir<sup>e</sup>

<sup>a</sup>Department of Chemistry, Jadavpur University, Kolkata 700032, India.

<sup>b</sup>Plant Biotechnology Laboratory, Post Graduate Department of Botany, Ramakrishna Mission Vivekananda Centenary College, Rahara, Kolkata -700118, India.

<sup>c</sup>Department of Pharmaceutical Technology, Jadavpur University, Kolkata 700032, India.

<sup>d</sup>Department of Chemistry, Uluberia College, Howrah, West Bengal 711 315, India.

<sup>e</sup>Department of Chemistry, College of Science, King Saud University, Riyadh 11451, Saudi Arabia.

\*Corresponding authors

Email: [nayimsepay@yahoo.com](mailto:nayimsepay@yahoo.com) (NS) and [uhalder2002@yahoo.com](mailto:uhalder2002@yahoo.com) (UCH)

## Methods

The study focused on the mutant and earlier three CoV M<sup>PRO</sup>, i.e. 6lu7, 2q6d, 2q6f and 2h2z, respectively, for in silico finding of having the capacity to develop into inhibitors in the near future from chromanone derivatives.

### *Protein structure modelling.*

The crystal data of all the protein structures were downloaded from Protein Data Bank (PDB ID: 6lu7, 2q6d, 2q6f and 2h2z). The structures used for further studies was prepared by Discovery studio 2017 R2 client. The modelling of protein structure was done on I-TASSER. All the pictures of the protein was made with MolSoft-ICM browser, Discovery studio 2017 R2 client and Samson core software.

### *Bioinformatics.*

The protein sequences of selected four above mentioned proteins have been obtained from Discovery studio 2017 R2 client. The sequences were aligned using the bioinformatics web server Clustal Omega of European Bioinformatics Institute (EMBL-EBI). The outcome of the alignment protein sequences was analysed in the same web server, m-view and visualised it with the colour coding provided by the server.

### *Molecular Electrostatic Potential (MEP) Analysis*

The compounds **2a-j** were optimized with the help of density functional theory using B3LYP functional at 6-311g level of basis set. Molecular electrostatic potential map around the molecular frame work were calculated at the combined B3LYP and 6-31g level of theory with the 0.03 iso values. For all of these DFT calculations, Gaussian 09W software with D1 revision has been used at windows platform [1].

### *ADME study*

ADME and toxicity of the designed compounds were predicted at the SwissADME web server [2]. Using huge database, the server can speculate physicochemical properties, lipophilicity, water solubility, pharmacokinetics, drug likeness and medicinal properties with high precision.

### *Molecular docking estimation*

Energy minimized structure of compounds **2a-j**, obtained from DFT optimization and were used for docking with the mentioned four protein structures. The structure of the compounds and proteins were prepared in appropriate format for the studies with the help of MGL Tools. For docking studies, AutoDock 4.2 was employed by following standard procedure as described.<sup>3</sup> In this case, a 40 x 40 x 40 grid box has been used [3].

### *Toxicity*

Cardiac Toxicity of all the compounds (2a-2j) have been predicted with the help of a web-accessible computational equipment Pred-hERG [4]. Acute toxicity, organ toxicity, toxicological endpoint, nuclear receptor signalling pathways and stress response pathway was also calculated for these compounds and some FDA approved anti-viral drugs using PROTOX-II [5].

Reference sequence (1): 2q6d  
 Identities normalised by aligned length.  
 Colored by: identity

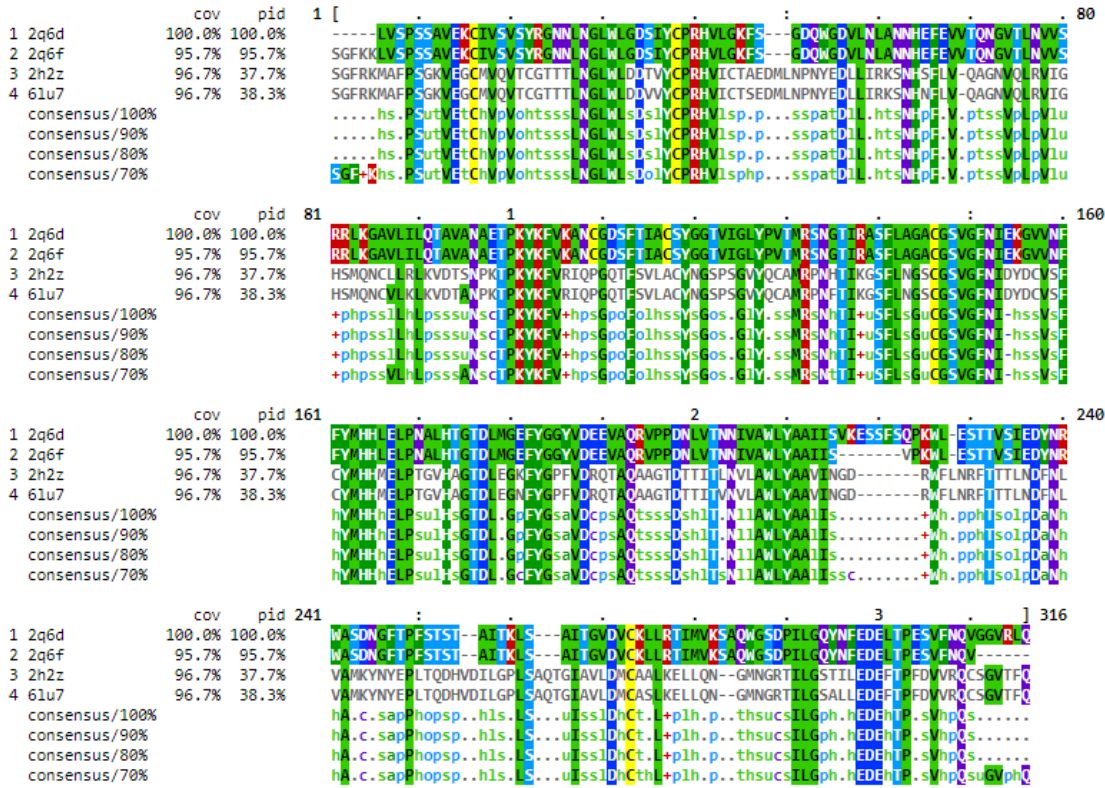

Figure S1: MView representation of protein sequence alignment of novel and previously known CoV M<sup>pro</sup> (pdb ids: 6lu7, 2q6d, 2q6f and 2h2z)

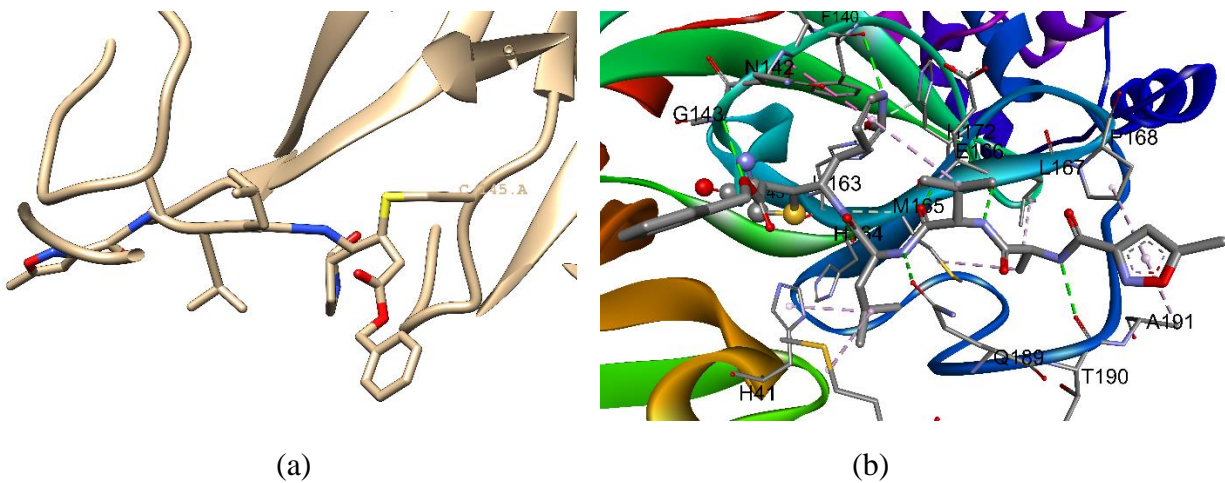

Figure S2: (a) **Binding of N3 ligand** Covalent Amino acid residue at the active site of the mutant coronavirus main protease (SARC-CoV-2 M<sup>pro</sup>) (pdb id 6lu7).

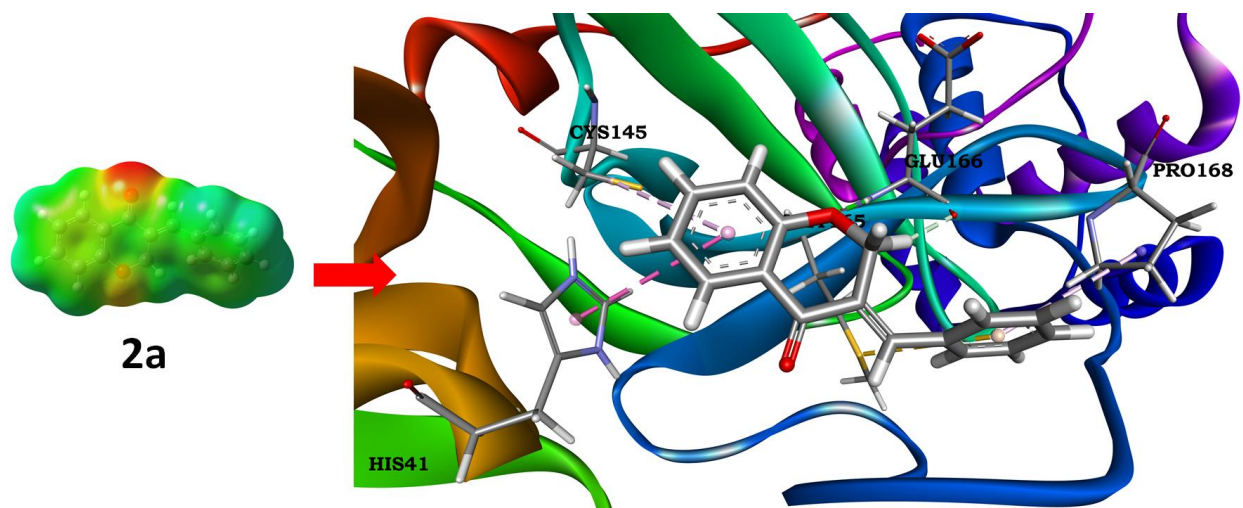

Figure S3: Docking pose of compound **2a** with SARC-CoV-2 M<sup>Pro</sup> of novel corona virus and the non-covalent interactions causes for their binding.

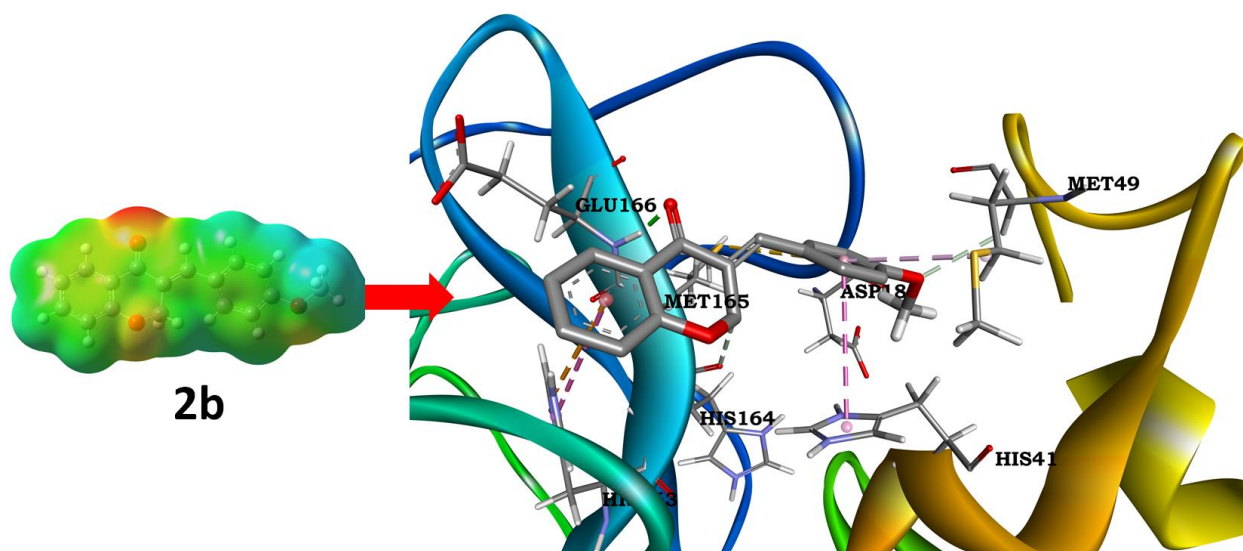

Figure S4: Docking pose of compound **2b** with SARC-CoV-2 M<sup>Pro</sup> of novel corona virus and the non-covalent interactions causes for their binding.



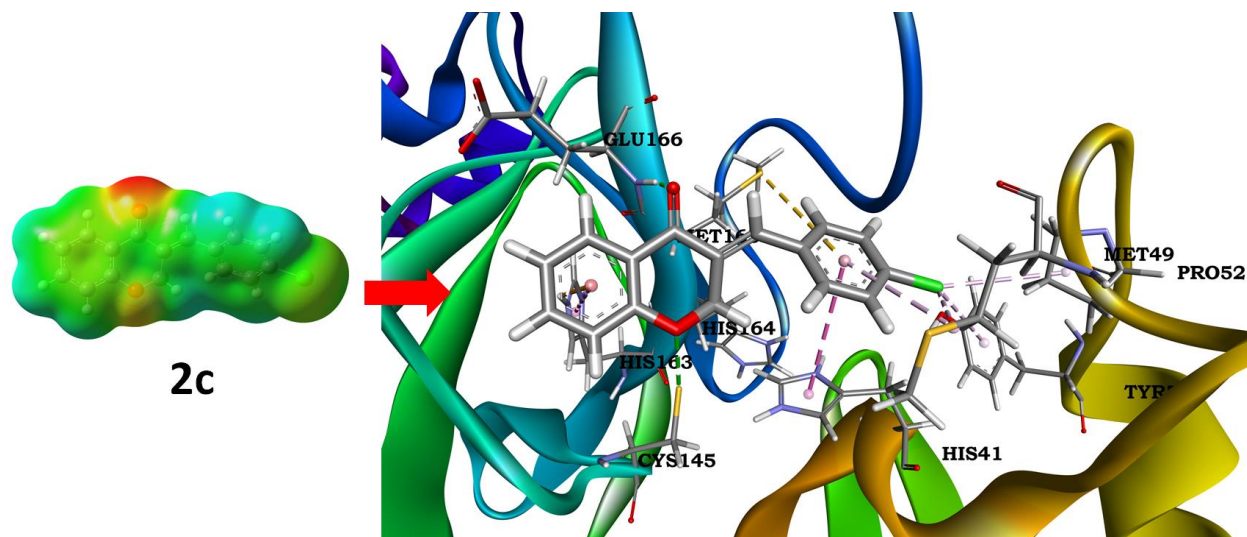

Figure S5: Docking pose of compound **2c** with SARC-CoV-2 M<sup>pro</sup> of novel corona virus and the non-covalent interactions causes for their binding.

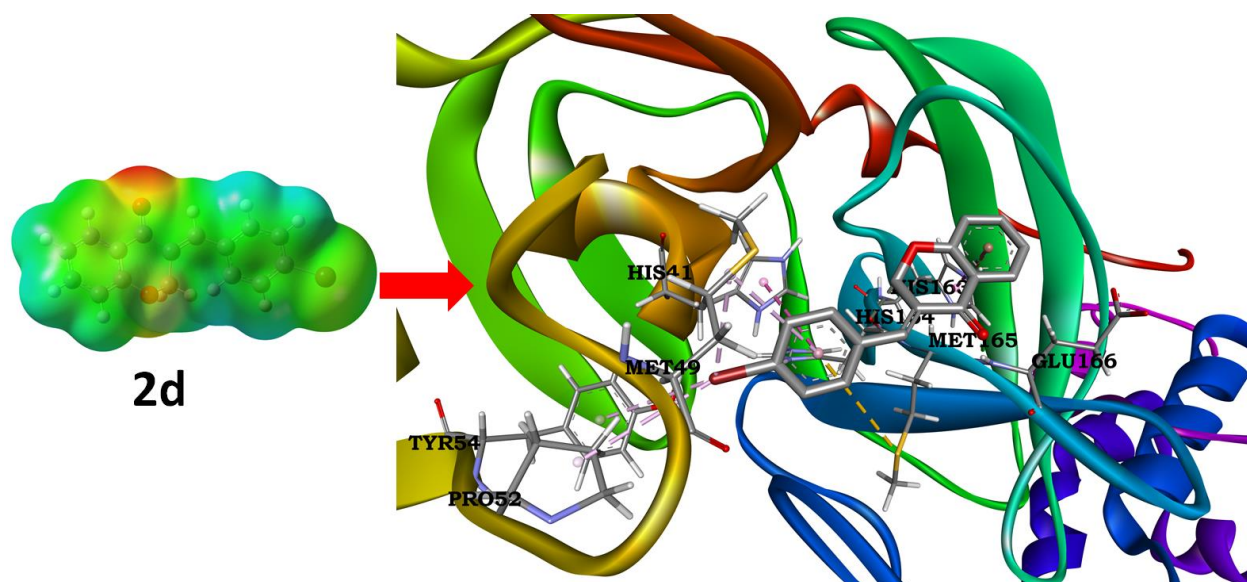

Figure S6: Docking pose of compound **2d** with SARC-CoV-2 M<sup>pro</sup> of novel corona virus and the non-covalent interactions causes for their binding.

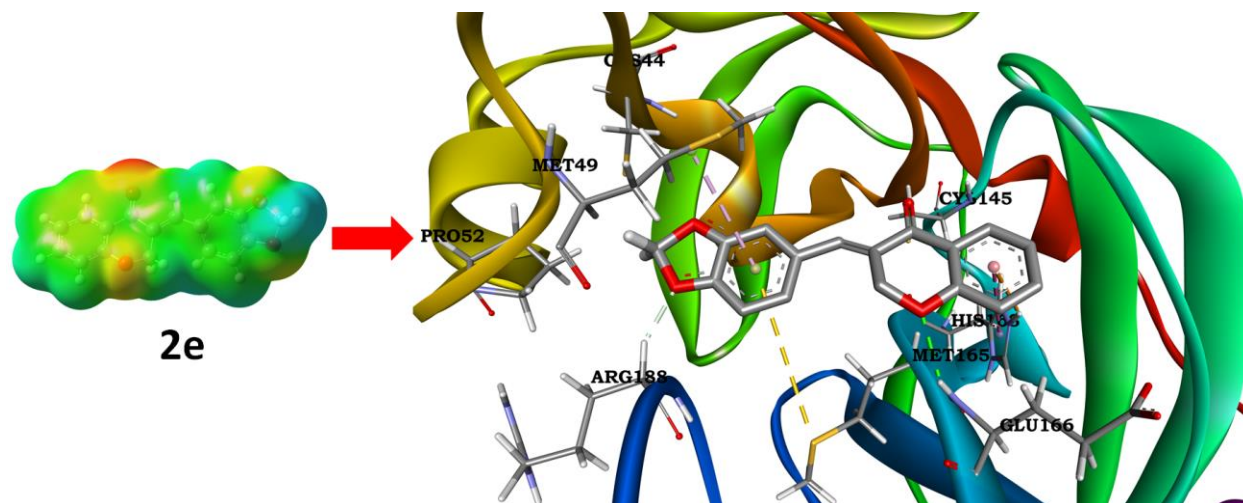

Figure S7: Docking pose of compound **2e** with SARC-CoV-2 M<sup>pro</sup> of novel corona virus and the non-covalent interactions causes for their binding.

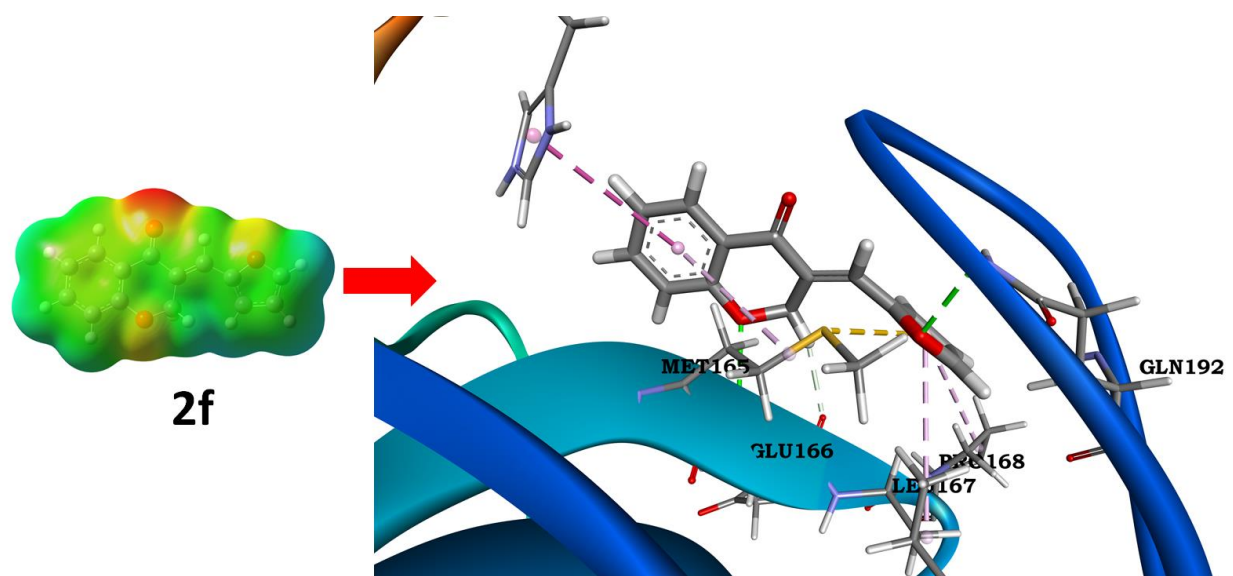

Figure S8: Docking pose of compound **2f** with SARC-CoV-2 M<sup>pro</sup> of novel corona virus and the non-covalent interactions causes for their binding.

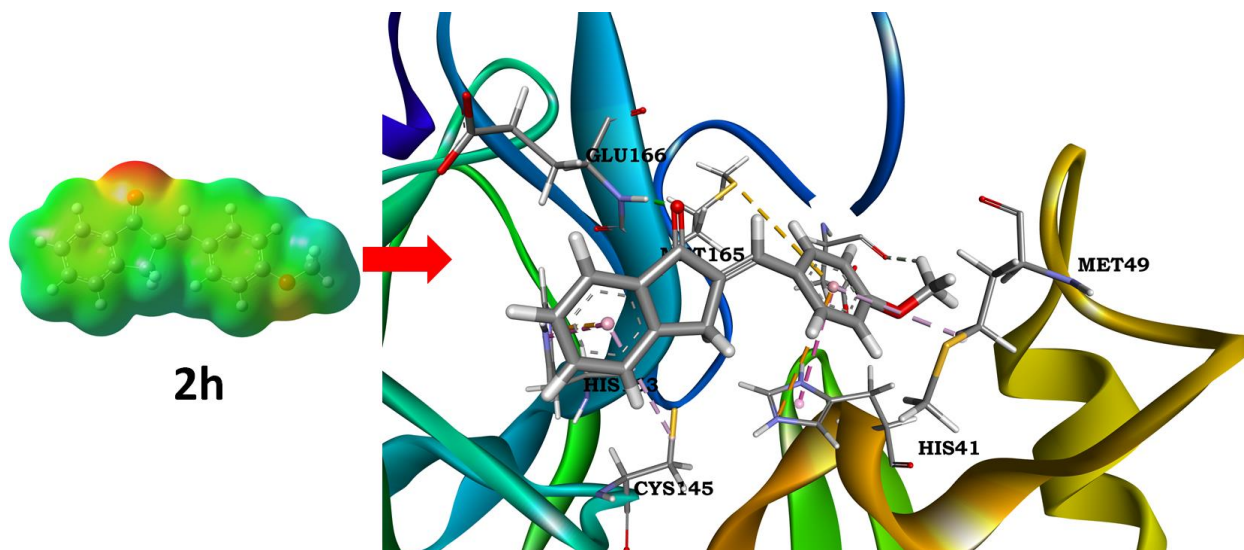

Figure S9: Docking pose of compound **2h** with SARC-CoV-2 M<sup>pro</sup> of novel corona virus and the non-covalent interactions causes for their binding.

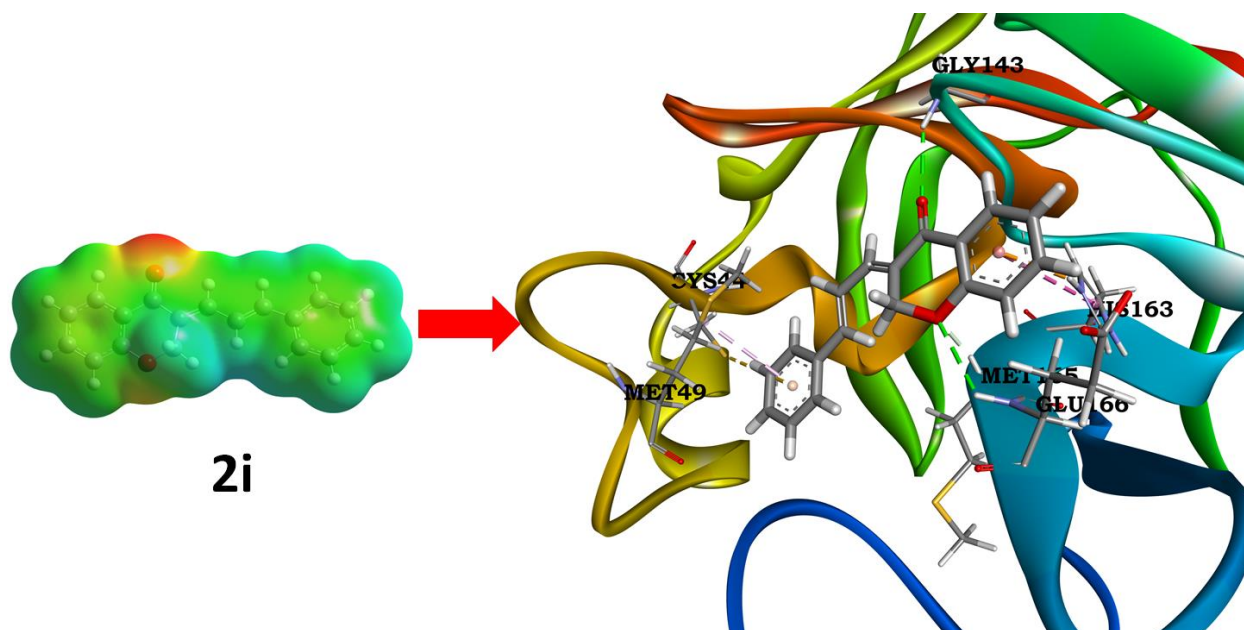

Figure S10: Docking pose of compound **2i** with SARC-CoV-2 M<sup>pro</sup> of novel corona virus and the non-covalent interactions causes for their binding.

Table S1 Protein inhibitory activity of some flavones and 3-benzylidene-4-chromanones

| Entry | Compound                                                                                                                                                                                                                                                                                                         | Inhibitory Activity                                           | Reference                                                                                                                                                                          |
|-------|------------------------------------------------------------------------------------------------------------------------------------------------------------------------------------------------------------------------------------------------------------------------------------------------------------------|---------------------------------------------------------------|------------------------------------------------------------------------------------------------------------------------------------------------------------------------------------|
| 1     | 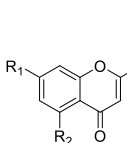<br>R1 R2 R3 R4 R5<br>H H H H H<br>H H NO2 H H<br>H H H NO2 H<br>H H Cl H H<br>H H H Cl H<br>H H F H H<br>H H H F H<br>H H H OMe H<br>H H OMe OMe NO2<br>H H NO2 H H<br>OH H H H H<br>OH OH H H H<br>OH H H F H<br>OH H H OMe H | Acetylcholinesterase                                          | <i>Med Chem Res.</i> <b>2018</b> , 27, 520–530,                                                                                                                                    |
| 2     |                                                                                                                                                                                                                                 | microsomal cytochrome P450                                    | <i>J.Biol.Chem.</i> <b>2007</b> , 282, 14348-14355                                                                                                                                 |
| 3     | <br>Quercetin                                                                                                                                                                                                                   | 1. Xanthine oxidase inhibition<br>2. PDE4 inhibition          | 1. <i>Arch. Biochem. Biophys.</i> <b>2008</b> , 469, 209–219<br>2. <i>Invest. New Drugs</i> <b>2008</b> , 26, 417–424<br><i>Biochem. Pharmacol.</i> <b>2004</b> , 68, 2087–2094    |
| 4     |                                                                                                                                                                                                                               | 1. NADPH oxidase inhibition<br>2. Xanthine oxidase inhibition | 1. <i>Arch. Biochem. Biophys.</i> <b>2008</b> , 469, 209–219<br>2. <i>Trends Pharmacol Sc</i> <b>2012</b> , 33, 602-610                                                            |
| 5     | <br>Baicalin                                                                                                                                                                                                                  | 1. Xanthine oxidase inhibition<br>2. PDE4 inhibition          | 1. <i>Arch. Biochem. Biophys.</i> <b>2008</b> , 469, 209–219<br>2. <i>Invest. New Drugs</i> <b>2008</b> , 26, 417–424<br>3. <i>Biochem. Pharmacol.</i> <b>2004</b> , 68, 2087–2094 |
| 6     | <br>Luteolin                                                                                                                                                                                                                  | 1. Xanthine oxidase inhibition<br>2. PDE4 inhibition          | 1. <i>Arch. Biochem. Biophys.</i> <b>2008</b> , 469, 209–219<br>2. <i>Invest. New Drugs</i> <b>2008</b> , 26, 417–424<br>3. <i>Biochem. Pharmacol.</i> <b>2004</b> , 68, 2087–2094 |



|    |                                                                                    |                                                                                                                                                                                                                                                                                                                                                                                                                                                                                                                                                                                                                                                                                 |                                     |                                                                      |    |    |   |   |   |   |    |    |   |    |    |    |    |    |   |    |    |   |   |    |   |     |   |    |    |    |   |   |    |   |   |   |    |    |   |   |   |   |   |   |   |    |              |                                                     |
|----|------------------------------------------------------------------------------------|---------------------------------------------------------------------------------------------------------------------------------------------------------------------------------------------------------------------------------------------------------------------------------------------------------------------------------------------------------------------------------------------------------------------------------------------------------------------------------------------------------------------------------------------------------------------------------------------------------------------------------------------------------------------------------|-------------------------------------|----------------------------------------------------------------------|----|----|---|---|---|---|----|----|---|----|----|----|----|----|---|----|----|---|---|----|---|-----|---|----|----|----|---|---|----|---|---|---|----|----|---|---|---|---|---|---|---|----|--------------|-----------------------------------------------------|
| 7  | 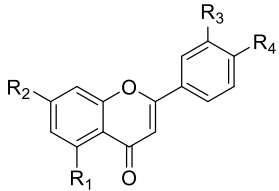  | <table border="0"> <tr> <td>R1</td> <td>R2</td> <td>R3</td> <td>R4</td> </tr> <tr> <td>H</td> <td>H</td> <td>H</td> <td>H</td> </tr> <tr> <td>OH</td> <td>OH</td> <td>H</td> <td>OH</td> </tr> <tr> <td>OH</td> <td>OH</td> <td>OH</td> <td>OH</td> </tr> <tr> <td>H</td> <td>OH</td> <td>OH</td> <td>H</td> </tr> <tr> <td>H</td> <td>OH</td> <td>H</td> <td>OMe</td> </tr> <tr> <td>H</td> <td>OH</td> <td>OH</td> <td>OH</td> </tr> <tr> <td>H</td> <td>H</td> <td>OH</td> <td>H</td> </tr> <tr> <td>H</td> <td>H</td> <td>OH</td> <td>OH</td> </tr> <tr> <td>H</td> <td>H</td> <td>H</td> <td>F</td> </tr> <tr> <td>H</td> <td>H</td> <td>H</td> <td>Me</td> </tr> </table> | R1                                  | R2                                                                   | R3 | R4 | H | H | H | H | OH | OH | H | OH | OH | OH | OH | OH | H | OH | OH | H | H | OH | H | OMe | H | OH | OH | OH | H | H | OH | H | H | H | OH | OH | H | H | H | F | H | H | H | Me | Tankyrases-2 | <i>J. Med. Chem.</i> <b>2013</b> ,<br>56, 3507-3517 |
| R1 | R2                                                                                 | R3                                                                                                                                                                                                                                                                                                                                                                                                                                                                                                                                                                                                                                                                              | R4                                  |                                                                      |    |    |   |   |   |   |    |    |   |    |    |    |    |    |   |    |    |   |   |    |   |     |   |    |    |    |   |   |    |   |   |   |    |    |   |   |   |   |   |   |   |    |              |                                                     |
| H  | H                                                                                  | H                                                                                                                                                                                                                                                                                                                                                                                                                                                                                                                                                                                                                                                                               | H                                   |                                                                      |    |    |   |   |   |   |    |    |   |    |    |    |    |    |   |    |    |   |   |    |   |     |   |    |    |    |   |   |    |   |   |   |    |    |   |   |   |   |   |   |   |    |              |                                                     |
| OH | OH                                                                                 | H                                                                                                                                                                                                                                                                                                                                                                                                                                                                                                                                                                                                                                                                               | OH                                  |                                                                      |    |    |   |   |   |   |    |    |   |    |    |    |    |    |   |    |    |   |   |    |   |     |   |    |    |    |   |   |    |   |   |   |    |    |   |   |   |   |   |   |   |    |              |                                                     |
| OH | OH                                                                                 | OH                                                                                                                                                                                                                                                                                                                                                                                                                                                                                                                                                                                                                                                                              | OH                                  |                                                                      |    |    |   |   |   |   |    |    |   |    |    |    |    |    |   |    |    |   |   |    |   |     |   |    |    |    |   |   |    |   |   |   |    |    |   |   |   |   |   |   |   |    |              |                                                     |
| H  | OH                                                                                 | OH                                                                                                                                                                                                                                                                                                                                                                                                                                                                                                                                                                                                                                                                              | H                                   |                                                                      |    |    |   |   |   |   |    |    |   |    |    |    |    |    |   |    |    |   |   |    |   |     |   |    |    |    |   |   |    |   |   |   |    |    |   |   |   |   |   |   |   |    |              |                                                     |
| H  | OH                                                                                 | H                                                                                                                                                                                                                                                                                                                                                                                                                                                                                                                                                                                                                                                                               | OMe                                 |                                                                      |    |    |   |   |   |   |    |    |   |    |    |    |    |    |   |    |    |   |   |    |   |     |   |    |    |    |   |   |    |   |   |   |    |    |   |   |   |   |   |   |   |    |              |                                                     |
| H  | OH                                                                                 | OH                                                                                                                                                                                                                                                                                                                                                                                                                                                                                                                                                                                                                                                                              | OH                                  |                                                                      |    |    |   |   |   |   |    |    |   |    |    |    |    |    |   |    |    |   |   |    |   |     |   |    |    |    |   |   |    |   |   |   |    |    |   |   |   |   |   |   |   |    |              |                                                     |
| H  | H                                                                                  | OH                                                                                                                                                                                                                                                                                                                                                                                                                                                                                                                                                                                                                                                                              | H                                   |                                                                      |    |    |   |   |   |   |    |    |   |    |    |    |    |    |   |    |    |   |   |    |   |     |   |    |    |    |   |   |    |   |   |   |    |    |   |   |   |   |   |   |   |    |              |                                                     |
| H  | H                                                                                  | OH                                                                                                                                                                                                                                                                                                                                                                                                                                                                                                                                                                                                                                                                              | OH                                  |                                                                      |    |    |   |   |   |   |    |    |   |    |    |    |    |    |   |    |    |   |   |    |   |     |   |    |    |    |   |   |    |   |   |   |    |    |   |   |   |   |   |   |   |    |              |                                                     |
| H  | H                                                                                  | H                                                                                                                                                                                                                                                                                                                                                                                                                                                                                                                                                                                                                                                                               | F                                   |                                                                      |    |    |   |   |   |   |    |    |   |    |    |    |    |    |   |    |    |   |   |    |   |     |   |    |    |    |   |   |    |   |   |   |    |    |   |   |   |   |   |   |   |    |              |                                                     |
| H  | H                                                                                  | H                                                                                                                                                                                                                                                                                                                                                                                                                                                                                                                                                                                                                                                                               | Me                                  |                                                                      |    |    |   |   |   |   |    |    |   |    |    |    |    |    |   |    |    |   |   |    |   |     |   |    |    |    |   |   |    |   |   |   |    |    |   |   |   |   |   |   |   |    |              |                                                     |
| 8  |   |                                                                                                                                                                                                                                                                                                                                                                                                                                                                                                                                                                                                                                                                                 | $\alpha$ -glucosidase<br>inhibitory | <i>Chem. Pharm.<br/>Bull.</i> <b>2016</b> , 64,<br>1203–1207.        |    |    |   |   |   |   |    |    |   |    |    |    |    |    |   |    |    |   |   |    |   |     |   |    |    |    |   |   |    |   |   |   |    |    |   |   |   |   |   |   |   |    |              |                                                     |
| 9  |   |                                                                                                                                                                                                                                                                                                                                                                                                                                                                                                                                                                                                                                                                                 | MAO-B inhibitor                     | <i>Eur. J. Med. Chem.</i><br><b>2016</b> , 117, 292–300.             |    |    |   |   |   |   |    |    |   |    |    |    |    |    |   |    |    |   |   |    |   |     |   |    |    |    |   |   |    |   |   |   |    |    |   |   |   |   |   |   |   |    |              |                                                     |
| 10 |   |                                                                                                                                                                                                                                                                                                                                                                                                                                                                                                                                                                                                                                                                                 | AChE inhibitors                     | <i>J. Photochem.<br/>Photobiol.,B</i> <b>2014</b> ,<br>130, 179–187. |    |    |   |   |   |   |    |    |   |    |    |    |    |    |   |    |    |   |   |    |   |     |   |    |    |    |   |   |    |   |   |   |    |    |   |   |   |   |   |   |   |    |              |                                                     |
| 11 |  |                                                                                                                                                                                                                                                                                                                                                                                                                                                                                                                                                                                                                                                                                 | AChE inhibitors                     | <i>J. Photochem.<br/>Photobiol.,B</i> <b>2014</b> ,<br>130, 179–187. |    |    |   |   |   |   |    |    |   |    |    |    |    |    |   |    |    |   |   |    |   |     |   |    |    |    |   |   |    |   |   |   |    |    |   |   |   |   |   |   |   |    |              |                                                     |

Table S2 Predicted data of lipophilicity of the designed compound by different methods.

| Molecule  | iLOGP | XLOGP3 | WLOGP | MLOGP | Silicos-IT Log P |
|-----------|-------|--------|-------|-------|------------------|
| <b>2a</b> | 2.69  | 3.33   | 3.24  | 2.64  | 4.02             |
| <b>2b</b> | 3.00  | 3.31   | 3.25  | 2.27  | 4.03             |
| <b>2c</b> | 2.92  | 3.96   | 3.89  | 3.15  | 4.63             |
| <b>2d</b> | 3.06  | 4.03   | 4.00  | 3.27  | 4.67             |
| <b>2e</b> | 2.94  | 3.15   | 2.97  | 2.09  | 3.88             |
| <b>2f</b> | 2.44  | 2.43   | 2.83  | 1.29  | 3.41             |
| <b>2g</b> | 2.88  | 4.5    | 4.6   | 4.08  | 5.19             |
| <b>2h</b> | 2.72  | 3.76   | 3.41  | 2.88  | 4.42             |
| <b>2i</b> | 3.03  | 3.98   | 3.79  | 3.04  | 4.57             |
| <b>2j</b> | 1.49  | 2.48   | 2.95  | 1.71  | 2.84             |

Table S3: Predicted data of water solubility of the designed compound by different methods.

|                               | <b>2a</b> | <b>2b</b> | <b>2c</b>  | <b>2d</b> | <b>2e</b> | <b>2f</b> | <b>2g</b> | <b>2h</b> | <b>2i</b> | <b>2j</b> |
|-------------------------------|-----------|-----------|------------|-----------|-----------|-----------|-----------|-----------|-----------|-----------|
| ESOL LogS                     | -3.83     | -3.89     | -4.41      | -4.73     | -3.92     | -3.19     | -4.85     | -4.1      | -4.29     | -3.62     |
| ESOL Solubility (mg/ml)       | 3.49E-02  | 3.44E-02  | 1.04E-02   | 5.81E-03  | 3.38E-02  | 1.47E-01  | 4.01E-03  | 2.01E-02  | 1.36E-02  | 7.26E-02  |
| ESOL Solubility (mol/l)       | 1.48E-04  | 1.29E-04  | 3.85E-05   | 1.84E-05  | 1.20E-04  | 6.51E-04  | 1.40E-05  | 8.02E-05  | 5.18E-05  | 2.43E-04  |
| ESOL Class                    | Soluble   | Soluble   | Mod. solu* | Mod. solu | Soluble   | Soluble   | Mod. solu | Mod. solu | Mod. solu | Soluble   |
| Ali Log S                     | -3.56     | -3.73     | -4.21      | -4.29     | -3.76     | -2.90     | -5.11     | -4.01     | -4.23     | -4.41     |
| Ali Solubility (mg/ml)        | 6.52E-02  | 4.93E-02  | 1.66E-02   | 1.63E-02  | 4.87E-02  | 2.84E-01  | 2.22E-03  | 2.47E-02  | 1.53E-02  | 1.16E-02  |
| Ali Solubility (mol/l)        | 2.76E-04  | 1.85E-04  | 6.13E-05   | 5.18E-05  | 1.74E-04  | 1.26E-03  | 7.75E-06  | 9.88E-05  | 5.84E-05  | 3.89E-05  |
| Ali Class                     | Soluble   | Soluble   | Mod. solu  | Mod. solu | Soluble   | Soluble   | Mod. solu | Mod. solu | Mod. solu | Mod. solu |
| Silicos-IT LogSw              | -5.41     | -5.53     | -6.02      | -6.24     | -5.15     | -4.62     | -6.38     | -5.8      | -5.5      | -4.25     |
| Silicos-IT Solubility (mg/ml) | 9.19E-04  | 7.80E-04  | 2.59E-04   | 1.83E-04  | 1.97E-03  | 5.36E-03  | 1.18E-04  | 4.00E-04  | 8.37E-04  | 1.66E-02  |
| Silicos-IT Solubility (mol/l) | 3.89E-06  | 2.93E-06  | 9.55E-07   | 5.79E-07  | 7.01E-06  | 2.37E-05  | 4.13E-07  | 1.60E-06  | 3.19E-06  | 5.56E-05  |
| Silicos-IT class              | Mod. solu | Mod. solu | Poor solu  | Poor solu | Mod. solu | Mod. solu | Poor solu | Mod. solu | Mod. solu | Mod. solu |

\*Mod. solu = Moderately soluble

Table S4: Predicted data of pharmacokinetics, drug likeness and medicinal chemistry of the designed compound

|                         | 2a    | 2b    | 2c    | 2d    | 2e    | 2f    | 2g    | 2h    | 2i    | 2j    |
|-------------------------|-------|-------|-------|-------|-------|-------|-------|-------|-------|-------|
| GI absorption           | High  |
| BBB permeant            | Yes   | No    |
| Pgp substrate           | No    | Yes   |
| CYP1A2 inhibitor        | Yes   | No    |
| CYP2C19 inhibitor       | Yes   | No    |
| CYP2C9 inhibitor        | No    | Yes   | Yes   | Yes   | Yes   | No    | Yes   | No    | Yes   | No    |
| CYP2D6 inhibitor        | No    | Yes   | No    | No    | Yes   | No    | No    | Yes   | No    | No    |
| CYP3A4 inhibitor        | No    | Yes   | No    | No    | Yes   | Yes   | No    | No    | No    | Yes   |
| log Kp (cm/s)           | -5.38 | -5.57 | -5.14 | -5.36 | -5.77 | -5.95 | -4.85 | -5.16 | -5.07 | -6.37 |
| Bioavailability Score   | 0.55  | 0.55  | 0.55  | 0.55  | 0.55  | 0.55  | 0.55  | 0.55  | 0.55  | 0.55  |
| Synthetic Accessibility | 2.74  | 2.87  | 2.73  | 2.76  | 3.00  | 2.77  | 3.17  | 2.55  | 3.05  | 3.29  |

Table S5: Predicted data of cardiotoxicity of compounds **2a-j**<sup>4</sup>

| Compound  | Prediction / Potency                       | Confidence | Applicability domain (AD)              | Probabilty Map                                                                        |
|-----------|--------------------------------------------|------------|----------------------------------------|---------------------------------------------------------------------------------------|
| <b>2a</b> | Weak or Moderate Potential cardiotoxic (+) | 50%        | No<br>(Value= 0.24 and limit = 0.26 )  | 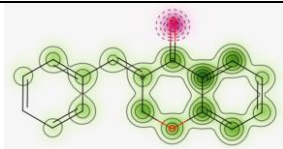 |
| <b>2b</b> | Weak or Moderate Potential cardiotoxic (+) | 60%        | Yes<br>(Value= 0.26 and limit = 0.26 ) |  |
| <b>2c</b> | Weak or Moderate Potential cardiotoxic (+) | 60%        | No<br>(Value= 0.24 and limit = 0.26 )  |  |
| <b>2d</b> | Weak or Moderate Potential cardiotoxic (+) | 50%        | No<br>(Value= 0.24 and limit = 0.26 )  |  |

|           |                                            |     |                                        |                                                                                       |
|-----------|--------------------------------------------|-----|----------------------------------------|---------------------------------------------------------------------------------------|
| <b>2e</b> | Weak or Moderate Potential cardiotoxic (+) | 50% | No<br>(Value= 0.23 and limit = 0.26 )  | 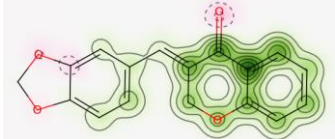   |
| <b>2f</b> | Weak or Moderate Potential cardiotoxic (+) | 50% | No<br>(Value= 0.22 and limit = 0.26 )  |    |
| <b>2g</b> | Weak or Moderate Potential cardiotoxic (+) | 60% | No<br>(Value= 0.23 and limit = 0.26 )  |    |
| <b>2h</b> | Weak or Moderate Potential cardiotoxic (+) | 60% | Yes<br>(Value= 0.27 and limit = 0.26 ) |    |
| <b>2i</b> | Non-cardiotoxic (-)                        | 60% | No<br>(Value= 0.24 and limit = 0.26 )  |    |
| <b>2j</b> | Non-cardiotoxic (-)                        | 60% | No<br>(Value= 0.20 and limit = 0.26 )  |  |

Table S6: Predicted data of toxicity of compounds **2a-j**<sup>5</sup>

|                                             | <b>2a</b> | <b>2b</b> | <b>2c</b> | <b>2d</b> | <b>2e</b> | <b>2f</b> | <b>2g</b> | <b>2h</b> | <b>2i</b> | <b>2j</b> |
|---------------------------------------------|-----------|-----------|-----------|-----------|-----------|-----------|-----------|-----------|-----------|-----------|
| Predicted LD50: mg/kg                       | 2647      | 2647      | 2647      | 2647      | 2000      | 2647      | 2400      | 1600      | 2000      | 400       |
| Prediction accuracy: %                      | 68.07     | 68.07     | 68.07     | 67.38     | 67.38     | 67.38     | 54.26     | 68.07     | 67.38     | 54.26     |
| <b>Organ Toxicity</b>                       |           |           |           |           |           |           |           |           |           |           |
| Hepatotoxicity (Probability)                | 0.70      | 0.68      | 0.60      | 0.53      | 0.76      | 0.72      | 0.55      | 0.56      | 0.70      | 0.57      |
| <b>Toxicity end points</b>                  |           |           |           |           |           |           |           |           |           |           |
| Carcinogenicity                             | 0.55      | 0.52      | 0.51      | 0.56      | 0.57      | 0.55      | 0.69      | 0.51      | 0.55      | 0.54      |
| Immunotoxicity                              | 0.55      | 0.95      | 0.85      | 0.90      | 0.98      | 0.88      | 0.67      | 0.72      | 0.77      | 0.84      |
| Mutagenicity                                | 0.57      | 0.51      | 0.50      | 0.54      | 0.51      | 0.51      | 0.56      | 0.70      | 0.57      | 0.65      |
| Cytotoxicity                                | 0.64      | 0.73      | 0.63      | 0.69      | 0.88      | 0.76      | 0.69      | 0.69      | 0.64      | 0.65      |
| <b>Nuclear receptor signalling pathways</b> |           |           |           |           |           |           |           |           |           |           |

|                                                                                       |                 |                 |                 |                 |                 |                 |      |                 |                 |      |
|---------------------------------------------------------------------------------------|-----------------|-----------------|-----------------|-----------------|-----------------|-----------------|------|-----------------|-----------------|------|
| Aryl hydrocarbon Receptor (AhR)                                                       | 0.59            | 0.65            | 0.62            | 0.54            | 0.59            | 0.59            | 0.53 | 0.58            | 0.59            | 0.66 |
| Androgen Receptor (AR)                                                                | 0.93            | 0.92            | 0.94            | 0.95            | 0.94            | 0.95            | 0.98 | 0.97            | 0.93            | 0.95 |
| Androgen Receptor Ligand Binding Domain (AR-LBD)                                      | 0.95            | 0.97            | 0.91            | 0.91            | 0.88            | 0.95            | 0.92 | 0.98            | 0.95            | 0.94 |
| Aromatase                                                                             | 0.68            | 0.78            | 0.59            | 0.68            | 0.92            | 0.83            | 0.69 | 0.82            | 0.68            | 0.81 |
| Estrogen Receptor Alpha (ER)                                                          | 0.52            | 0.53            | 0.77            | 0.78            | 0.83            | 0.68            | 0.72 | 0.57            | 0.52            | 0.57 |
| Estrogen Receptor Ligand Binding Domain (ER-LBD)                                      | 0.92            | 0.88            | 0.90            | 0.91            | 0.98            | 0.97            | 0.87 | 0.83            | 0.92            | 0.80 |
| Peroxisome Proliferator Activated Receptor Gamma (PPAR-Gamma)                         | 0.93            | 0.95            | 0.77            | 0.75            | 0.96            | 0.93            | 0.80 | 0.95            | 0.93            | 0.90 |
| <b>Stress response pathways</b>                                                       |                 |                 |                 |                 |                 |                 |      |                 |                 |      |
| Nuclear factor (erythroid-derived 2)-like 2/antioxidant responsive element (nrf2/ARE) | 0.88            | 0.86            | 0.76            | 0.76            | 0.83            | 0.88            | 0.64 | 0.74            | 0.88            | 0.82 |
| Heat shock factor response element (HSE)                                              | 0.88            | 0.86            | 0.76            | 0.76            | 0.83            | 0.88            | 0.64 | 0.74            | 0.88            | 0.82 |
| Mitochondrial Membrane Potential (MMP)                                                | 0.58            | 0.60            | 0.52            | 0.52            | 0.64            | 0.61            | 0.59 | 0.51            | 0.58            | 0.55 |
| Phosphoprotein (Tumor Suppressor) p53                                                 | 0.65            | 0.63            | 0.51            | 0.52            | 0.67            | 0.63            | 0.62 | 0.51            | 0.65            | 0.69 |
| ATPase family AAA domain containing protein 5 (ATAD5)                                 | 0.80            | 0.72            | 0.88            | 0.88            | 0.82            | 0.80            | 0.87 | 0.84            | 0.80            | 0.74 |
|                                                                                       |                 |                 |                 |                 |                 |                 |      |                 |                 |      |
| Toxicity Target                                                                       | Amine Oxidase A | -    | Amine Oxidase A | Amine Oxidase A | -    |

Weak Active, Strong Active, Weak Inactive, Strong Inactive



Table S7: Predicted data of toxicity of some FDA approved anti-viral drugs<sup>5</sup>

|                                                                                       | Rilpivirine | Dolutegravir | Glecaprevir | Grazoprevir | Paritaprevir |
|---------------------------------------------------------------------------------------|-------------|--------------|-------------|-------------|--------------|
| Predicted LD50: mg/kg                                                                 | 2450        | 1600         | 68          | 68          | 200          |
| Prediction accuracy: %                                                                | 67.38       | 54.26        | 23          | 54.26       | 54.26        |
| <b>Organ Toxicity</b>                                                                 |             |              |             |             |              |
| Hepatotoxicity (Probability)                                                          | 0.55        | 0.76         | 0.56        | 0.59        | 0.51         |
| <b>Toxicity end points</b>                                                            |             |              |             |             |              |
| Carcinogenicity                                                                       | 0.69        | 0.62         | 0.58        | 0.58        | 0.63         |
| Immunotoxicity                                                                        | 0.94        | 0.98         | 0.96        | 0.99        | 0.99         |
| Mutagenicity                                                                          | 0.60        | 0.56         | 0.64        | 0.62        | 0.63         |
| Cytotoxicity                                                                          | 0.76        | 0.62         | 0.50        | 0.54        | 0.54         |
| <b>Nuclear receptor signalling pathways</b>                                           |             |              |             |             |              |
| Aryl hydrocarbon Receptor (AhR)                                                       | 0.66        | 0.89         | 0.90        | 0.87        | 0.90         |
| Androgen Receptor (AR)                                                                | 0.99        | 0.94         | 0.94        | 0.92        | 0.95         |
| Androgen Receptor Ligand Binding Domain (AR-LBD)                                      | 0.98        | 0.97         | 0.91        | 0.93        | 0.93         |
| Aromatase                                                                             | 0.82        | 0.88         | 0.83        | 0.92        | 0.94         |
| Estrogen Receptor Alpha (ER)                                                          | 0.61        | 0.84         | 0.87        | 0.88        | 0.89         |
| Estrogen Receptor Ligand Binding Domain (ER-LBD)                                      | 0.95        | 0.95         | 0.95        | 0.97        | 0.97         |
| Peroxisome Proliferator Activated Receptor Gamma (PPAR-Gamma)                         | 0.98        | 0.97         | 0.92        | 0.85        | 0.88         |
| <b>Stress response pathways</b>                                                       |             |              |             |             |              |
| Nuclear factor (erythroid-derived 2)-like 2/antioxidant responsive element (nrf2/ARE) | 0.96        | 0.95         | 0.88        | 0.88        | 0.92         |
| Heat shock factor response element (HSE)                                              | 0.96        | 0.95         | 0.88        | 0.88        | 0.92         |
| Mitochondrial Membrane Potential (MMP)                                                | 0.81        | 0.76         | 0.62        | 0.61        | 0.73         |
| Phosphoprotein (Tumor Suppressor) p53                                                 | 0.84        | 0.76         | 0.85        | 0.85        | 0.87         |
| ATPase family AAA domain containing protein 5 (ATAD5)                                 | 0.83        | 0.94         | 0.92        | 0.95        | 0.95         |

---

## References

1. Gaussian 09, Revision D.01, M. J. Frisch, G. W. Trucks, H. B. Schlegel, G. E. Scuseria, M. A. Robb, J. R. Cheeseman, G. Scalmani, V. Barone, B. Mennucci, G. A. Petersson, H. Nakatsuji, M. Caricato, X. Li, H. P. Hratchian, A. F. Izmaylov, J. Bloino, G. Zheng, J. L. Sonnenberg, M. Hada, M. Ehara, K. Toyota, R. Fukuda, J. Hasegawa, M. Ishida, T. Nakajima, Y. Honda, O. Kitao, H. Nakai, T. Vreven, J. A. Montgomery, Jr., J. E. Peralta, F. Ogliaro, M. Bearpark, J. J. Heyd, E. Brothers, K. N. Kudin, V. N. Staroverov, R. Kobayashi, J. Normand, K. Raghavachari, A. Rendell, J. C. Burant, S. S. Iyengar, J. Tomasi, M. Cossi, N. Rega, J. M. Millam, M. Klene, J. E. Knox, J. B. Cross, V. Bakken, C. Adamo, J. Jaramillo, R. Gomperts, R. E. Stratmann, O. Yazyev, A. J. Austin, R. Cammi, C. Pomelli, J. W. Ochterski, R. L. Martin, K. Morokuma, V. G. Zakrzewski, G. A. Voth, P. Salvador, J. J. Dannenberg, S. Dapprich, A. D. Daniels, Ö. Farkas, J. B. Foresman, J. V. Ortiz, J. Cioslowski, and D. J. Fox, Gaussian, Inc., Wallingford CT, 2009.
2. Daina, A.; Michielin, O.; Zoete, V., SwissADME: a free web tool to evaluate pharmacokinetics, drug-likeness and medicinal chemistry friendliness of small molecules, *Scientific Reports*, **2017**, *7*, 42717
3. Sousa; S. F.; Fernandes, P. A.; Ramos, M. J. Protein-ligand docking: current status and future challenges. *Proteins*. **2006**, *65*, 15-26.
4. <http://predherg.labmol.com.br/>
5. [http://tox.charite.de/protox\\_II/index.php?site=compound\\_input](http://tox.charite.de/protox_II/index.php?site=compound_input)
